1 Systematic assessment of commercially available low-input miRNA library preparation  
2 kits

---

3 Fatima Heinicke<sup>1</sup>, Xiangfu Zhong<sup>1</sup>, Manuela Zucknick<sup>2</sup>, Johannes Breidenbach<sup>3</sup>, Arvind  
4 Sundaram<sup>1</sup>, Siri T. Flåm<sup>1</sup>, Magnus Leithaug<sup>1</sup>, Marianne Dalland<sup>1</sup>, Andrew Farmer<sup>4</sup>, Jordana  
5 M. Henderson<sup>5</sup>, Melanie A. Husson<sup>6</sup>, Pamela Moll<sup>7</sup>, Loan Nguyen<sup>8</sup>, Amanda McNulty<sup>4</sup>,  
6 Jonathan M. Shaffer<sup>6</sup>, Sabrina Shore<sup>5,9</sup>, HoiChong Karen Yip<sup>8</sup>, Jana Vitkowska<sup>7</sup>, Simon  
7 Rayner<sup>1</sup>, Benedicte A Lie<sup>1\*</sup>, Gregor D. Gilfillan<sup>1\*</sup>

8 <sup>1</sup> Department of Medical Genetics, Oslo University Hospital and University of Oslo, Oslo,  
9 0450 Norway

10 <sup>2</sup> Department of Biostatistics, Oslo Centre for Biostatistics and Epidemiology, University of  
11 Oslo, Oslo, Norway

12 <sup>3</sup> Norwegian Institute for Bioeconomy Research, National Forest Inventory, Ås, 1431 Norway

13 <sup>4</sup> Takara Bio USA, Inc., Mountain View, CA, USA

14 <sup>5</sup> TriLink Biotechnologies LLC, San Diego, CA, USA

15 <sup>6</sup> QIAGEN Sciences, Frederick, MD 21703, USA

16 <sup>7</sup> Lexogen GmbH, Vienna, Austria

17 <sup>8</sup> SeqMatic, LLC, Fremont, CA 94539, USA

18 <sup>9</sup> Current address: Singular Genomics, La Jolla, CA, USA

19 \* contributed equally

20

21

## 22 **Abstract**

23 High-throughput sequencing is increasingly favoured to assay the presence and abundance of  
24 micro RNAs (miRNAs) in biological samples, even from low RNA amounts, and a number  
25 of commercial vendors now offer kits that allow miRNA sequencing from sub-nanogram (ng)  
26 inputs. However, although biases introduced during library preparation have been  
27 documented, the relative performance of current reagent kits has not been investigated in  
28 detail. Here, six commercial kits capable of handling <100ng total RNA input were used for  
29 library preparation, performed by kit manufactures, on synthetic miRNAs of known  
30 quantities and human biological total RNA samples. We compared the performance of  
31 miRNA detection sensitivity, reliability, titration response and the ability to detect  
32 differentially expressed miRNAs. In addition, we assessed the use of unique molecular  
33 identifiers sequence (UMI) tags in one kit. We observed differences in detection sensitivity  
34 and ability to identify differentially expressed miRNAs between the kits, but none were able  
35 to detect the full repertoire of expected miRNAs. The reliability within the replicates of all  
36 kits was good, while larger differences were observed between the kits, although none could  
37 accurately quantify the majority of miRNAs. UMI tags, at least within the input ranges tested,  
38 offered little advantage to improve data utility. In conclusion, biases in miRNA abundance  
39 are heavily influenced by the kit used for library preparation, suggesting that comparisons of  
40 datasets prepared by different procedures should be made with caution. This article is  
41 intended to assist researchers select the most appropriate kit for their experimental conditions.

42  
43 **Keywords:** microRNA, miRNA, small RNA-seq, library preparation, sequencing bias, low  
44 RNA input, NGS, Next Generation Sequencing, UMI

45

## 46 **Introduction**

47 Micro RNAs (miRNAs) are ~22 nucleotide long non-coding small RNAs that regulate gene  
48 expression at a post-transcriptional level by binding to their mRNA targets to inhibit  
49 translation. First discovered in the early 1990s<sup>1 2</sup>, miRNAs have been shown to impact  
50 biological processes such as cellular differentiation and development<sup>3-6 7-9 10-12 13 14</sup>.  
51 Alterations in miRNA expression have been observed in various diseases<sup>15 16 17</sup> and an  
52 accurate method for detecting and measuring miRNA expression is therefore crucial. In  
53 recent years, next generation sequencing (NGS) has evolved as the method of choice. The  
54 main advantages of NGS, compared to qPCR and microarray techniques, are the possibility  
55 to discover novel miRNAs and the ability to detect differences in miRNA sequences on a  
56 single base level. Furthermore, NGS enables the study of low-abundance miRNAs, which is  
57 especially useful when examining miRNAs in specific cell types or body fluids like serum  
58 and plasma. Accordingly, the latest miRNA library preparation kits allow inputs as low as  
59 100 picograms total RNA. The library preparation process typically consists of (i) addition of  
60 adapter sequences onto the miRNA, (ii) reverse transcription and (iii) PCR amplification  
61 prior to sequencing. The kits investigated in this study used both two adapter and single-  
62 adapter circularization protocols which can broadly be divided into two classes: those  
63 employing RNA ligases (e.g. T4 RNA ligase) and those employing polyadenylation (poly-A)  
64 and template-switching oligonucleotides to attach adapter sequences to the single-stranded  
65 miRNAs.

66  
67 Despite the reported advantages of NGS, the miRNA abundance detected by sequencing and  
68 that in the original sample have been shown to differ by up to four orders of magnitude<sup>18</sup>. In  
69 particular, the addition of adapters onto the miRNA insert has been identified as a major  
70 contributor to this bias<sup>19 20</sup>. For protocols utilizing T4 RNA ligase, adapter ligation is

71 influenced by the ligase used, the miRNA insert and adapter primary sequence, as well as the  
72 GC content and the secondary structures of miRNA insert and adapter<sup>19-23</sup>. For poly-A  
73 utilizing protocols, the enzyme poly (A) polymerase has also been reported to be influenced  
74 by miRNA primary sequence and secondary structure<sup>24</sup>. Other reported possible sources of  
75 bias during library preparation include the reverse transcription and PCR steps, with PCR in  
76 particular able to introduce both amplification bias and duplicate reads, but results have been  
77 contradictory<sup>19-21</sup>. A recent study recommended the use of unique molecular identifiers  
78 (UMI) to mitigate the reverse-transcription and PCR biases in future experiments<sup>25</sup>. Previous  
79 studies also reported that the incorporation of UMIs into sequence adapters resulted in  
80 improved accuracy both in RNA-seq and smallRNA-seq analysis<sup>26 27</sup>.

81

82 In this study we aimed to systematically assess the miRNA repertoire and frequency observed  
83 in NGS data using six different low-input library preparation protocols (Table 1).

84 Commercial vendors marketing kits stating compatibility with total RNA amounts  $\leq 100$  ng  
85 were invited to participate. The performance of the protocols was compared with regard to  
86 their detection rate sensitivity, reliability and ability to identify differentially expressed  
87 miRNAs. In addition, the relevance of UMIs was studied. All analyses were performed on  
88 low-input well-defined synthetic miRNA and human-derived total RNA samples.

89

## 90 **Results**

### 91 **Experimental design and miRNA read yields**

92 Synthetic miRNA and biologically derived human total RNA samples (21 samples in total)  
93 were distributed to participating companies for library preparation (Figure 1a). Upon return  
94 of libraries, library yield and size were measured (Supplementary Figure 2). Libraries were

95 pooled based on their miRNA content with the aim of obtaining at least 5 million reads  
96 apiece. Based on the presence of additional small RNAs in some libraries, particularly those  
97 prepared with the CATS and SMARTer-beta reagents, which displayed a wider range of  
98 insert sizes, we did not expect all libraries to produce similar read counts at this stage.  
99 Nevertheless, a large number of reads from both CATS and SMARTer-beta kits failed to pass  
100 QC threshold filters.

101 The number of sequencing reads obtained ranged from 400,000 to more than 33 million reads  
102 for the individual libraries (Supplementary Table 4).

103

104 For all library preparation kits, the greatest proportion of reads were discarded during  
105 mapping, most likely as a result of not allowing for any mismatches (Figure 1b and  
106 Supplementary Figure 3). The absolute number of reads excluded differed between the kits.

107 As anticipated, a higher fraction of miRNA reads was obtained in the synthetic miRNA  
108 samples compared to the human total RNA samples (Figure 1b), since the human total RNA  
109 samples also contain additional classes of small RNA. SMARTer-beta and CATS returned  
110 the lowest proportion of miRNA reads both in the synthetic miRNA and the human total  
111 RNA samples compared to the other library preparation kits while TailorMix, followed by  
112 QIAseq produced the highest proportions of miRNA reads (Figure 1b).

113

114 To comprehensively evaluate the sensitivity and reliability of the library preparation kits, the  
115 synthetic miRNA samples were randomly down-sampled to 2.5 million and human total  
116 RNA samples to 0.75 million miRNA reads. The libraries of SMARTer-beta and CATS did  
117 not reach these thresholds and were therefore excluded from further analysis. The results  
118 presented hereafter are based on calculations using the down-sampled data with the exception

119 of the differential expression and UMI analyses for which raw (not down-sampled) miRNA  
120 reads were used.

121

## 122 **Detection rate sensitivity**

123 Applying a relaxed detection threshold where miRNAs were defined as detected if one or  
124 more read counts were registered, the detection rate sensitivity for all kits ranged from 94.7%  
125 to 99.1%, and all miRNAs could be detected in at least one kit and replicate. QIAseq  
126 followed by TailorMix detected the highest numbers of miRNAs in all three replicates in all  
127 the mixes (Figure 2a). QIAseq and TailorMix also missed the fewest miRNAs in either one,  
128 two, or all three triplicates. When comparing the detection rate sensitivity of the 1.0ng  
129 synthetic miRNA samples (mix A-D) with the 0.1ng synthetic miRNA samples (mix E), no  
130 striking difference in the number of detected miRNAs could be observed for any of the kits  
131 (Figure 2a).

132

133 Most of the miRNAs that were undetected in QIAseq and TailorMix were neither detected by  
134 the other two kits (Supplementary Figures 4 and 5). TailorMix was the only reagent that  
135 detected each of the 903 equimolar miRNAs in at least one sample (Supplementary Figure 5).  
136 srLp followed by CleanTag showed the highest numbers of kit-specific undetectable  
137 miRNAs.

138

139 Analysis of the 40 non-equimolar miRNAs revealed that miRNAs undetected in one or more  
140 replicates belonged mostly to miRNAs present at low levels (Supplementary Figure 6), with  
141 QIAseq showing the highest detection rate, again followed by TailorMix. Notably, CleanTag  
142 and srLp failed to detect some miRNAs present at relatively high concentrations in all the  
143 replicates (mix C and D, Supplementary Figure 6). However, even though the majority of the

144 non-equimolar miRNAs could be detected in all replicates, the analysis indicated that factors  
145 in addition to miRNA abundance influence detection rate sensitivity.

146

147 We next compared the performance at different detection thresholds, i.e. 1, 10, 50, 100, 200  
148 read counts per million (CPM) for synthetic miRNA samples in all mix triplicates for each kit  
149 (Figure 2b). With the exception of some of the non-equimolar miRNA oligonucleotides  
150 present at the lowest concentration, all synthetic miRNAs should in theory obtain CPM  
151 values above 200 with the library size of 2.5 million mapped miRNA reads. However, a  
152 sharp decline in detection was observed at increasing CPM thresholds. Nonetheless, QIAseq  
153 followed by TailorMix consistently detected the highest number of miRNAs across all  
154 thresholds.

155

#### 156 **Intra-rater and Inter-rater reliability**

157 Rlog transformed miRNA count data were used for the for intra- and inter-rater reliability  
158 calculations. Intra-rater reliability calculations (the concordance between miRNA read counts  
159 within the replicates of the library preparation kit) revealed excellent reliability for the  
160 synthetic miRNA and the human total RNA samples within all tested kits with ICC values  
161 above 0.99 and 0.98, respectively (Supplementary Table 5). Similarly, very strong  
162 correlations were found when Pearson correlation coefficients were calculated ( $r > 0.97$ ,  
163  $p < 0.05$ ) (Supplementary Figure 7 and 9a). Bland-Altman plots, which describe the  
164 agreement between two replicates by presenting the difference of them against the mean, also  
165 showed good agreement (Supplementary Figure 8 and 9b). For all Bland-Altman  
166 comparisons the bias was close to 0. The line of equality (not presented in our Bland-Altman  
167 plots) was always within the agreement limits, which indicates a lack of systematic error in

168 the measurements within the replicates. All in all, strong intra-rater reliabilities were  
169 observed within the samples prepared by each kit.  
170  
171 For the inter-rater reliability calculations (concordance of read counts seen between the  
172 different kits) the first replicate of each mix, RA or healthy control sample was randomly  
173 chosen. The synthetic miRNA and the human total RNA samples revealed good and excellent  
174 inter-rater reliability with ICC values above 0.83 and 0.95 respectively (Supplementary Table  
175 6). The correlation between the different kits was above 0.76 ( $p < 0.05$ ) for the synthetic  
176 miRNA and above 0.92 for the human total RNA samples (Supplementary Figure 10).  
177 However, differences in the correlations between the reagents were seen for the synthetic  
178 miRNA samples. The kits with the highest correlations ( $r > 0.94$ ,  $p < 0.05$ ) were, independent  
179 of whether mix A-E was considered, CleanTag and srLp while QIAseq showed the lowest  
180 correlation to the other kits. The Bland-Altman plots revealed no systematic error when  
181 comparing the different kits to each other (Supplementary Figures 11 and 12). The limits of  
182 agreements were smallest for CleanTag and srLp across all tested mixes in the synthetic  
183 miRNA samples indicating a high agreement between those two kits. In summary, a modest-  
184 to-good inter-rater reliability was obtained when comparing the mix-specific replicates of the  
185 four miRNA library preparation kits with each other, with QIAseq showing the greatest  
186 differences from the other reagents.  
187  
188 The reliability measured against the theoretical miRNA concentration was only assessed for  
189 the synthetic miRNA samples. For the 903 equimolar miRNAs, the fold deviation of the first  
190 replicate of mix A from the median count for that sample was calculated as a rlog ratio  
191 (Supplementary Figure 13). When the absolute value of the rlog fold deviation for a miRNA  
192 was less than or equal to one, the miRNA was counted as equimolar. For the four kits this



193 was the case for 39.8 to 42.0% of the equimolar miRNAs. The remaining miRNAs showed a  
194 bias towards over-representation (positive rlog fold change) rather than under-representation.  
195 The coefficient of variation of the rlog counts across all replicates for the equimolar miRNAs  
196 was lowest for QIAseq, followed by TailorMix, CleanTag and srLp, respectively  
197 (Supplementary Table 7).

198

199 For the 40 non-equimolar miRNAs, the correlation between the rlog counts of each library  
200 preparation kit and their theoretical concentration varied between the mixes for all kits.  
201 Overall, mix A and mix E showed greater correlations ( $0.41 < r < 0.61$ ,  $p < 0.05$ ) than mix B  
202 to mix D ( $0.08 < r < 0.47$ ,  $p < 0.05$ ) (Supplementary Table 8). QIAseq showed the highest  
203 correlation coefficients across all samples. All in all, these results suggest that on one hand  
204 the reliability between the reagents is good, but on the other hand that none of the reagents  
205 are ideally suited for accurate miRNA quantification.

206

## 207 **Differential expression**

208 Most miRNA profiling studies aim to identify differentially expressed (DE) miRNAs  
209 between samples of interest. When comparing mix A and mix B of the synthetic miRNA  
210 samples, ideally all 40 non-equimolar miRNAs should be detected as DE with a log<sub>2</sub> fold  
211 change greater than or equal to one. All kits detected between 32 to 35 DE miRNAs (Figure  
212 3a). However, some of those miRNAs (CleanTag, TailorMix and srLp=2 and QIAseq=1)  
213 were from the pool of equimolar miRNAs. Of the 40 non-equimolar miRNAs, 26 were  
214 detected to be DE by all kits, although they did not always agree on the log fold changes  
215 (Figure 3b). The non-equimolar miRNAs hsa-miR-1199-5p, hsa-miR-22-5p and hsa-miR-  
216 940, which were three of the ten miRNAs expected to show the lowest fold differences (fold  
217 change of 2) between mix A and mix B, could not be detected as DE by any of the reagents.

218

219 In order to control as best possible that the levels of miRNA in mix A and mix B were as  
220 expected, we performed quantitative reverse-transcriptase PCR assays on 16 selected non-  
221 equimolar miRNAs (Supplementary Figure 14), which confirmed the intended ratios in the  
222 starting material.

223

224 Differential expression analysis of the human total RNA samples revealed different numbers  
225 of DE miRNAs detected by the kits. CleanTag detected 19 DE miRNAs, QIAseq and  
226 TailorMix detected two DE miRNAs each, while srLp did not detect any (Figure 3c). With  
227 the exception of hsa-miR-486-3p, no overlap between the DE miRNAs was seen amongst the  
228 kits (Figure 3d).

229

### 230 **Titration response**

231 The titration response of the 40 non-equimolar miRNAs in mixes A - D (Figure 1a) was  
232 compared by scoring a miRNA as titrating or non-titrating based on detection in the expected  
233 concentration order in the four mixes. Since there were five miRNAs at each chosen  
234 concentration, the fraction of titrating miRNAs (0, 0.2, 0.4, 0.6, 0.8 or 1) was calculated for  
235 each reagent kit for each concentration group (Table 2). The highest fraction of titrating  
236 miRNAs was seen for QIAseq, which correctly scored all miRNA concentrations with greater  
237 than 2-fold differences in mix A through mix D.

238

### 239 **Effectiveness of QIAseq unique molecular identifier sequence tags**

240 QIAseq was the only kit included in this study that implements unique molecular identifiers  
241 (UMIs) during library preparation, which are claimed to enable more accurate quantification  
242 of miRNAs. For both synthetic miRNA and human total RNA samples, very strong Pearson

243 correlations were observed between the rlog transformed raw read and UMI counts  
244 (Supplementary Figure 15). Comparison of the rlog sum of all UMI and ordinary read counts  
245 revealed the sum of UMI counts to be negligibly smaller than the ordinary read counts for  
246 both synthetic miRNA and human total RNA samples (Supplementary Figure 16a, b).

247

248 To further examine whether UMI read counts might reduce undesirable over-representation  
249 of miRNAs that were favourably amplified or sequenced, we examined the abundance of the  
250 ten miRNAs with the highest ordinary read counts for each sample and compared this to their  
251 respective UMI counts (Supplementary Figure 16c,d). Amongst those miRNAs no  
252 overestimation of the ordinary read counts was observed compared to the UMI counts.

253

## 254 **Discussion**

255 Several publications have revealed discrepancies between the frequencies of miRNAs present  
256 in the original samples and those detected by sequencing approaches<sup>18 20</sup>. The adapter  
257 ligation steps in the small library preparation procedure, in addition to miRNA sequence and  
258 structure, have emerged as being most critical when trying to explain the discrepancy<sup>18 19 21 43</sup>  
259<sup>44 20 22</sup>. As an alternative to the ligase-dependent ligation step in library preparation, poly-  
260 adenylation based procedures have been developed. Additional biases might be introduced  
261 during reverse transcription and PCR steps, but in this case results have been contradictory  
262 (<sup>19-21</sup>,<sup>25</sup>). The use of UMI tags has therefore been suggested to remove this potential bias<sup>25</sup>.  
263 Here we performed a comprehensive comparison of six low input small RNA sequencing  
264 reagents utilizing both ligase-depend, polyA-based and single-adapter methods, including one  
265 kit that employed UMI tags. Note that we assessed here only the performance of the kits to  
266 identify miRNAs; other small RNA species that may be captured were not assessed.

267

## 268 **Sequencing yields and miRNA read proportions**

269 Considerably different numbers of raw reads were obtained from the different kits. The kits  
270 from TailorMix and QIAseq returned the highest miRNA read counts both in the synthetic  
271 miRNA and the human total RNA samples. However, raw read outputs cannot be used to  
272 judge the performance of a method. Furthermore, since the samples from SMARTer-beta  
273 were sequenced alone in a single lane, we cannot exclude that technical issues affecting only  
274 that lane were responsible for the low raw read numbers that passed filters. The input range  
275 tested in this study was at or below the indicated range stated for the SMARTer-beta kit (100  
276 ng -1 ug total RNA or 2 ng – 200 ng enriched small RNA); this may have resulted in the  
277 observed poor performance. Since this study was performed, the kit has been re-optimized  
278 and released with a new formulation and improved performance. Nonetheless, the low  
279 proportion of reads mapping to miRNAs from both the CATS and SMARTer-beta was  
280 clearly evident, which could be attributable to inefficient removal of other small RNA species  
281 during library preparation. However, greater numbers of reads that were not counted as  
282 miRNA (due to imperfect match in length to the database reference sequence) were  
283 noticeable for CATS, which may indicate that polyadenylation-based methods are trickier to  
284 process during data analysis, due to uncertainties on the length of the poly-A tail added. To  
285 reduce the influence of technical aspects (e.g. different library size selection and purification  
286 methods, as well as raw read yields) on the comparisons, all miRNA counts were down-  
287 sampled to the same levels. CATS and SMARTer-beta did not reach the selected thresholds  
288 and were therefore excluded from further analysis.

289

290 **Detection rate sensitivity**

291 When applying low detection rate sensitivity thresholds, most synthetic miRNAs could be  
292 detected by the four remaining kits, indicating that all of them may be suited to assess the  
293 overall miRNA repertoire. However, when applying more stringent detection thresholds  
294 ranging from 1cpm to 200cpm, greater differences in detection rates between the kits became  
295 evident, and QIAseq and TailorMix emerged as the most sensitive. It is worth noting that kit  
296 specific biases played a greater role in miRNA detection than input RNA amounts, at least  
297 within the ranges tested here (0.1-1.0 ng miRNA).

298

299 **Reliability**

300 Intra-rater reliability showed very high concordance between miRNA counts within the  
301 replicates of a miRNA library preparation kit, independent of the kit, for both synthetic  
302 miRNA and human total RNA inputs. Similar results have been reported by Giraldez, et al.<sup>44</sup>  
303 and Wright, et al.<sup>25</sup>, although they refer to intra-rater reliability as reproducibility and  
304 consistency respectively. The intra-rater reliability was strong both for 0.1ng and 1.0ng  
305 synthetic miRNA samples for all kits in our study (data not shown) which is promising given  
306 current interest in using low RNA inputs derived from small biological specimens.

307

308 In concordance with the findings reported by Giraldez, et al.<sup>44</sup>, Coenen-Stass, et al.<sup>45</sup> and  
309 Wright, et al.<sup>25</sup>, inter-rater reliability (concordance of read counts seen between the different  
310 kits, also called reproducibility or consistency across replicates) was lower compared to the  
311 intra-rater reliability. In particular, QIAseq deviated from the other kits, but we stress that this  
312 does not indicate poorer performance. QIAseq employs a different 3' adapter sequence  
313 compared to the other three kits which may underlie the dissimilar preference for subset of  
314 miRNAs observed. These observations underscore the emerging conclusion that kit-specific

315 differences should be considered by any researchers comparing miRNA-seq datasets, as  
316 supported by another recent study<sup>46</sup>. Notably, the concordance between the miRNA counts  
317 measured and the expected concentration for the synthetic miRNA samples was low, and  
318 revealed that none of the library preparation kits could accurately quantify the majority of  
319 miRNAs.

320

### 321 **Differential expression**

322 Differential expression analysis of synthetic miRNA mix A versus mix B revealed that all  
323 kits could detect at least 31 out of 40 non-equimolar miRNA correctly as DE (fold change  
324  $\geq 2$ ). MiRNAs hsa-miR-1199-5p, hsa-miR-22-5p and hsa-miR-940 were never detected as  
325 DE by any of the kits. These miRNAs were present at two-fold concentration differences, the  
326 lowest fold change tested, which can be challenging. In general, all reagents displayed greater  
327 problems to detect small fold-change differences, reminiscent of results seen in the recent  
328 study by Giraldez, et al.<sup>44</sup>.

329

330 Our study offered the additional possibility to study levels of false positive DE miRNAs  
331 detected from the 903 equimolar miRNAs. Equimolar miRNAs found to be DE were  
332 characteristically detected as DE with low fold-changes and showed little agreement between  
333 the kits, consistent with their being false positive calls. Taken together, QIAseq showed  
334 slightly higher sensitivity (true positives) and slightly higher specificity (fewer false  
335 positives) than the other reagents, although the false-positive calls did fall within the  
336 expected rate set for the analysis (False discovery rate = 0.05). Reinforcing these conclusions,  
337 the titration response analysis clearly demonstrated the superior performance of the QIAseq  
338 reagents to most faithfully represent the levels of miRNAs in input material.

339

340 It nonetheless appears that the different reagents have differing preferences for particular  
341 miRNAs. The primary sequence of terminal miRNA nucleotides<sup>18</sup>, secondary structure  
342 affecting ligation sites<sup>47</sup> and co-folding of the miRNA and ligated adapters<sup>21</sup> have all been  
343 documented as sources of bias affecting miRNA detection. Interestingly, the 3' adapter  
344 sequence in the QIAseq kit differs from the other three kits analysed. However, our attempts  
345 to explain the differences observed between the kits based on primary sequence or secondary  
346 structure analyses were inconclusive (data not shown).

347

348 Greater differences between kits were observed by examining DE miRNAs detected when  
349 comparing the RA patient pool and healthy control pool of human CD8+ T cell RNA, where  
350 the number of DE miRNA varied between none (srLp) to 19 (CleanTag). There are few  
351 preceding studies of miRNAs from blood-isolated CD8+ cells in rheumatoid arthritis, but  
352 some of the miRNAs found to be DE in this study have previously been associated with RA,  
353 e.g. miR-221-3p<sup>48</sup>, miR-223-3p<sup>49-51</sup>, miR-374b-5p<sup>52</sup> and miR-486-3p<sup>52</sup>, however further  
354 confirmation is needed. Worryingly, in addition to the varying number of DE miRNA  
355 detected by the different kits, there was almost no concordance between the miRNAs  
356 identified. Taken together, it is advisable to interpret DE miRNA results from studies  
357 employing different library preparation methods with caution.

358

### 359 **Re-analysis of QIAseq dataset utilising UMIs**

360 Reverse transcription and PCR-amplification may be potential sources of bias during library  
361 preparation, and PCR can also introduce duplicate reads. QIAseq was the only kit tested to  
362 address the issue of duplicate reads by the inclusion of UMIs, however, under the employed  
363 conditions, no appreciable difference between UMI counts and the ordinary read counts were  
364 detected, mirroring the findings of Wong, et al.<sup>46</sup>. Fu, et al.<sup>27</sup> observed that higher fractions

365 of PCR duplicates could be observed when reducing the starting material, but when  
366 comparing the 1.0ng and 0.1ng synthetic miRNA samples, no difference in the proportion of  
367 PCR duplicates was seen. Nonetheless, it remains possible that at lower concentrations than  
368 tested here, UMIs may prove useful for the elimination of duplicates to improve dataset  
369 quality.

370

371 In conclusion, the QIAseq kit from QIAGEN consistently demonstrated performance at, or  
372 near, the top for all metrics examined. It should be mentioned that QIAGEN made an error  
373 affecting samples 1-8 in their first attempt at library preparation and were supplied with  
374 replacements. With the exception of performance in the titration response assay, the  
375 TailorMix kit from SeqMatic closely followed. Lexogen's srLp and Trilink's CleanTag kit  
376 also performed well, and the majority of differences we detected point to kit-specific biases.  
377 However, whilst the experiments conducted here show that sequencing is a very sensitive  
378 method for detecting miRNAs, even at low abundance, it is also clear that none of the kits  
379 performed impressively with regard to accurately reflecting the relative input levels of all  
380 miRNAs. There is clearly room for improvements in this regard for the development of  
381 further enhanced reagents or methods to accurately quantitate miRNA levels.

382

## 383 **Material and Methods**

### 384 **Study material**

385 The performance of six miRNA library preparation kits was examined using low-input  
386 material consisting of synthetic miRNA samples or human-derived total RNA samples. To  
387 maximize the possibility that each procedure was performed under optimum conditions,



388 samples were distributed to the kit vendors for library construction. Sequencing libraries were  
389 returned to the Norwegian Sequencing Centre for sequencing and data analysis.

### 390 **Synthetic miRNA samples**

391 The synthetic miRNA samples consisted of a mixture of equimolar and non-equimolar  
392 miRNAs. The miRXplore Universal Reference (Miltenyi, California, United States),  
393 comprising 962 HPLC purified, 5' phosphorylated, synthetic oligonucleotides of human,  
394 mouse, rat and viral miRNA origin, was used as an equimolar miRNA pool. For the non-  
395 equimolar pool, 40 additional HPLC purified, 5' phosphorylated, synthetic oligonucleotides  
396 representing human miRNA were purchased from Eurofins MWG Synthesis GmbH (Bavaria,  
397 Germany). Altogether five different miRNA mixes were created (denoted mix A to mix E,  
398 Figure 1a). Mix A and Mix B consisted of the equimolar miRNA pool supplemented with the  
399 non-equimolar pool present at eight different concentration ratios between the two mixes  
400 spanning a 100-fold range (Supplementary Table S1). Mix C was a titration of 0.75 mix A  
401 and 0.25 mix B, while mix D was a titration of 0.25 mix A and 0.75 mix B. In the case of  
402 mixes A-D, the total miRNA concentration was 30 nM, with individual equimolar miRNAs  
403 present at 30 pM and other miRNAs ranging from 3 – 300 pM. Mix E consisted of the same  
404 miRNAs as mix A but at a 10-fold lower concentration. Due to the low concentrations in the  
405 five synthetic miRNA mixes, the samples were blended with yeast (*Saccharomyces*  
406 *cerevisiae*) total RNA, which does not contain known endogenous miRNAs<sup>28</sup>, to minimise  
407 degradation and loss of material due to adhesion to plasticware, and to mimic the more  
408 complex total RNA mixtures encountered under typical usage. In each mix, the final RNA  
409 content was 2 ng/ $\mu$ l, with miRNA representing approx. 10% (w/w) of the total amount (mixes  
410 A-D) or 1% (mix E). The samples were distributed in triplicates to the participating vendors.  
411 To each of the triplicates in mix A to mix E, one additional specific miRNA (miR-147a, miR-  
412 212-3p or miR-412-3p) was added to check that the replicates were processed independently

413 throughout library preparation and were not combined into a single sample to increase  
414 reproducibility.

415

416 To verify the intended ratios of the synthetic miRNA sample starting material, quantitative  
417 reverse-transcriptase PCR was performed using 16 pre-designed TaqMan<sup>®</sup> Small RNA  
418 assays (Thermo Fisher Scientific, Waltham, MA USA) according to manufacturer's  
419 instructions. Assay details are provided in Supplementary Material and Methods. Relative  
420 abundances of miRNAs in mixes A and B were measured by absolute quantification relative  
421 to a standard curve.

#### 422 **Human-derived total RNA samples**

423 Peripheral blood CD8<sup>+</sup> T cells were magnetically sorted from newly diagnosed rheumatoid  
424 arthritis (RA) patients (n=4) and healthy controls (n=4) using the EasySep cell isolation  
425 system (Stemcell technologies, Vancouver, Canada). The RNA/DNA/Protein Purification Kit  
426 (Norgen Biotek, Ontario, Canada) was used to isolate total RNA. Only RNA samples with  
427 RNA integrity values above 8.5 were used for downstream analysis. To ensure the desired  
428 amount of total RNA input for the miRNA library preparation, the four RA patients and the  
429 four healthy controls were mixed together to obtain one pooled RA and one pooled healthy  
430 control sample respectively. Triplicates of these different sample types were distributed to the  
431 participants.

#### 432 **miRNA library preparation**

433 Each participant was asked to prepare miRNA libraries from the 21 samples described above  
434 using their specific miRNA library preparation kit. For optimization purposes the participants  
435 received a further 20 ng of synthetic miRNA (blend of Mix A and Mix B) and 200 ng total  
436 human RNA. All participants were requested to use the same Illumina i7 index sequence for

437 the same sample to avoid any possible effect of these sequences on the downstream library  
438 preparation and sequencing process. Detailed sample and index information can be found in  
439 Supplementary Table S2.

440

441 At the time of writing, four of the six kits were commercially available in the formats used  
442 for this study (CATs, QIAseq, CleanTag and TailorMix). A fifth kit, srLp, was also  
443 commercially available, but with different index primer sequences. For comparison purposes  
444 and to avoid possible bias arising from the use of different indexes, this participant  
445 synthesised custom index primers complying with the index sequences specified in this  
446 article. The SMARTer kit used in the study had not been released for purchase, but a  
447 modified version is now available. It should be noted that this study is not exhaustive, since  
448 two library preparation suppliers meeting the input amount inclusion criteria (PerkinElmer,  
449 formerly Bioo Scientific, and NEB) declined to participate. Detailed descriptions of the  
450 library preparation conditions employed by the producers of the specific reagents are  
451 supplied in the Supplementary Material and Methods.

452

### 453 **Sequencing**

454 All libraries were sequenced at the Norwegian Sequencing Center on the same single-read  
455 flow cell of a HiSeq 2500 (Illumina, San Diego, CA) with 75 bp reads generated using v4  
456 clustering and SBS reagents according to the manufacturer's instructions. To avoid  
457 sequencing lane bias, the libraries of srLp, QIAseq, TailorMix, CATS and CleanTag were  
458 randomly distributed over five lanes of the flow cell, equivalent to sequencing 21 libraries per  
459 lane (Supplementary Table S4). Due to concerns that the SMARTer beta libraries contained a  
460 large proportion of non-miRNA inserts (higher molecular weight products than expected,  
461 making it challenging to obtain equivalent numbers of reads per sample), these libraries were

462 sequenced independently from the other participants on a single lane (Supplementary Figure  
463 1),

## 464 **Bioinformatic analysis**

### 465 **Read mapping and reference sequences**

466 Primary base calling and quality scoring was performed using RTA v1.18.66.4 (Illumina),  
467 followed by demultiplexing and processing with Bcl2fastq v2.18.0.12 (Illumina).  
468 For trimming of the 3' adapter, cutadapt v1.15<sup>29</sup> with parameter `-m 10` was used. Detailed  
469 information about adapter sequences is provided in the Supplementary Material and Methods.  
470 Read mapping was performed using bowtie v1.1.2<sup>30</sup> with parameters `-a` and `--norc`. No  
471 mismatch was allowed. As reference, the expected pools of synthetic miRNAs (962 synthetic  
472 equimolar miRNAs originating from the miRXPlore universal reference and 40 non-  
473 equimolar miRNAs) were used for the synthetic miRNA samples, and the mature human  
474 miRNA sequences specified in miRBase<sup>31</sup> v21 for the human total RNA samples. We  
475 confirmed that all replicates had been processed separately by verifying the presence/absence  
476 of spiked replicate-specific miRNAs in the datasets from each sample. Further analysis  
477 revealed that 59 of the miRNA sequences included in the miRXPlore Universal Reference  
478 were identical to sequences in the *Saccharomyces cerevisiae* (sacCer3) genome  
479 (Supplementary Table S3). To avoid potential miscounting of yeast fragments in the  
480 downstream analysis, these miRNA were excluded and only the remaining 903 miRNA of  
481 the miRXPlore Universal Reference were analysed further. Mapped reads (restricted to  
482 miRNAs matching exactly to the reference sequence and length) were counted using a  
483 custom python script (available upon request).

## 484 **Read count modelling**

485 With the exception of differential expression and UMI analysis, all further downstream  
486 analyses were performed on down-sampled mapped miRNA reads to minimise confounding  
487 factors arising from sources such as read numbers and proportions of adapter dimer reads,  
488 which can be influenced by the purification method chosen and by pipetting errors. Random  
489 down-sampling to 2.5 million reads was performed for the synthetic miRNA samples and to  
490 0.75 million reads for the human total RNA samples. The seed number was set to 123.

491

492 In miRNA-seq count data, the average observed variance across samples increases with  
493 higher average expression of the miRNA. If this heteroscedastic behaviour of the count data  
494 is not taken into account, the results of most downstream analyses will be dominated by  
495 highly expressed and highly variable miRNAs. We therefore transformed count data, where  
496 indicated, with the rlog function of DeSeq2<sup>32</sup> (v1.20.0), which produces a superior  
497 homoscedastic output than log2 transformation for low- and high-expressed genes<sup>32</sup>.

## 498 **Data analysis**

### 499 **Detection rate sensitivity and reliability**

500 Data and statistical analyses were performed using R v3.5.2<sup>33</sup> and Python v2.7.13. Unless  
501 otherwise stated, ggplot2<sup>34</sup> was used for data visualization. Synthetic miRNA and human  
502 total RNA down-sampled read count data were used in the detection rate sensitivity analysis.  
503 Upset plots were produced using the R package UpSetR<sup>35</sup> v1.4.0.

504

505 Rlog transformed synthetic miRNA and human total RNA count data were used for assessing  
506 the reliability of the library preparation kits, on which intra-class correlation (ICC), Pearson  
507 correlation and Bland-Altman agreements calculations were performed. For ICC, the two-  
508 way mixed effects model, absolute agreement and single rater (ICC(3,1)) were applied using

509 the R package psych<sup>36</sup> v1.8.4. ICC values were interpreted according to the recommendations  
510 of Koo and Li<sup>37</sup> where ICC values above 0.9, between 0.75 and 0.9, between 0.5 and 0.75  
511 and below 0.5 indicate excellent, good, moderate and poor reliability respectively. Thresholds  
512 described by Chan<sup>38</sup> were used for the Pearson correlation where correlations above 0.8,  
513 between 0.6 and 0.8, between 0.3 and 0.6 and below 0.3 are described as very strong,  
514 moderately strong, fair and poor respectively. The R corrplot package<sup>39</sup> v0.84 was utilized for  
515 correlation plots and the R BlandAltmanLeh package<sup>40</sup> v0.31 for Bland Altman calculations.

### 516 **Differential expression and titration response**

517 Original read count data of mix A and mix B were used for the differential expression  
518 analysis using the R package edgeR<sup>41</sup> v3.22.3. For the synthetic miRNA samples a read count  
519 filtering of 3 counts per million (cpm) in at least two libraries was applied to the differential  
520 expression analysis while a filter of 20cpm in at least two libraries was used for the human  
521 total RNA samples. miRNAs were defined as significantly differentially expressed after  
522 multiple testing adjustment with the methods of Benjamini and Hochberg controlling for a  
523 false discovery rate of 0.05. In addition, only those miRNA with  $|\log_2 \text{FC}| > 1$  between the  
524 tested conditions were kept.

525

526 The titration response of the 40 non-equimolar miRNAs of the synthetic miRNA samples was  
527 examined in mixes A to D according to the analyses published by Shippy, et al.<sup>42</sup>. Average  
528 rlog expression values for each miRNA were calculated across the three replicates of each of  
529 mixes A to D. If the average expression values for each miRNA followed the expected  
530 concentration trend (across the four possible concentrations seen in each mix), it was scored  
531 as titrating. Any deviations from the expected trend were scored as non-titrating.

532 **UMI analysis**

533 QIAGEN's analysis tool Geneglobe was used for assessing the effectiveness of QIAsq's  
534 UMIs. For the synthetic miRNA samples the option "other" was chosen for mapping while  
535 "human" was chosen for the human total RNA samples during the primary data analysis. The  
536 resulting count table included UMI (after PCR duplicate removal) and raw (before PCR  
537 duplicate removal) read counts for each miRNA in the samples. Before analysing the  
538 correlation between UMI and raw read counts, the counts were rlog transformed.

539

540 **Acknowledgements**

541 We thank Iris Langstein and Philipp Korber for *S. cerevisiae* RNA. Dalia Daujotyte and  
542 Stephanie Bannister are also thanked for reviewing the results and manuscript.

543 **Funding statement**

544 This work was supported by the South-Eastern Regional Health Authorities under Grant  
545 2015034 and under Grant 2016122.

546 **Data availability statement**

547 Raw sequencing fastq files and miRNA count tables will be made available in the Gene  
548 Expression Omnibus database.

549 **Disclosure of interest**

550 AF and AM are employees of Takara Bio USA Inc., JMH is an employee of, and SS a  
551 former employee, of TriLink Biotechnologies LLC. MAH and JMS are employees of  
552 QIAGEN Sciences. PM and JV are employees of Lexogen GmbH. LN and HKY are  
553 employees of SeqMatic LLC. FH, XZ, MZ, JB, AS, STF, ML, MD, SR, BAL and GDG  
554 report no conflict of interest.

555

556 **References**

- 557 1. Wightman B, Ha I, Ruvkun G. Posttranscriptional regulation of the heterochronic gene  
558 lin-14 by lin-4 mediates temporal pattern formation in *C. elegans*. *Cell*  
559 1993;75(5):855-62.
- 560 2. Lee RC, Feinbaum RL, Ambros V. The *C. elegans* heterochronic gene lin-4 encodes  
561 small RNAs with antisense complementarity to lin-14. *Cell* 1993;75(5):843-54.
- 562 3. Chen C-Z, Li L, Lodish HF, et al. MicroRNAs modulate hematopoietic lineage  
563 differentiation. *Science* 2004;303(5654):83-86.
- 564 4. Ramkissoon SH, Mainwaring LA, Ogasawara Y, et al. Hematopoietic-specific  
565 microRNA expression in human cells. *Leukemia Research* 2006;30(5):643-47.
- 566 5. Sempere LF, Freemantle S, Pitha-Rowe I, et al. Expression profiling of mammalian  
567 microRNAs uncovers a subset of brain-expressed microRNAs with possible roles  
568 in murine and human neuronal differentiation. *Genome Biology* 2004;5(3):R13.
- 569 6. Giraldez AJ, Cinalli RM, Glasner ME, et al. MicroRNAs regulate brain morphogenesis in  
570 zebrafish. *Science* 2005;308(5723):833-38.
- 571 7. Bernstein E, Kim SY, Carmell MA, et al. Dicer is essential for mouse development.  
572 *Nature Genetics* 2003;35(3):215.
- 573 8. Murchison EP, Partridge JF, Tam OH, et al. Characterization of Dicer-deficient murine  
574 embryonic stem cells. *Proceedings of the National Academy of Sciences of the*  
575 *United States of America* 2005;102(34):12135-40.
- 576 9. Gangaraju VK, Lin H. MicroRNAs: key regulators of stem cells. *Nature Reviews*  
577 *Molecular Cell Biology* 2009;10(2):116.
- 578 10. Thai T-H, Calado DP, Casola S, et al. Regulation of the germinal center response by  
579 microRNA-155. *Science* 2007;316(5824):604-08.
- 580 11. Xiao C, Rajewsky K. MicroRNA control in the immune system: basic principles. *Cell*  
581 2009;136(1):26-36.
- 582 12. O'Connell RM, Rao DS, Chaudhuri AA, et al. Physiological and pathological roles for  
583 microRNAs in the immune system. *Nature Reviews Immunology* 2010;10(2):111.
- 584 13. Chen J-F, Mandel EM, Thomson JM, et al. The role of microRNA-1 and microRNA-133  
585 in skeletal muscle proliferation and differentiation. *Nature Genetics*  
586 2006;38(2):228.



- 587 14. Zhao Y, Samal E, Srivastava D. Serum response factor regulates a muscle-specific  
588 microRNA that targets Hand2 during cardiogenesis. *Nature*  
589 2005;436(7048):214.
- 590 15. Calin GA, Dumitru CD, Shimizu M, et al. Frequent deletions and down-regulation of  
591 micro-RNA genes miR15 and miR16 at 13q14 in chronic lymphocytic leukemia.  
592 *Proceedings of the National Academy of Sciences* 2002;99(24):15524-29.
- 593 16. Peng Y, Croce CM. The role of MicroRNAs in human cancer. *Signal transduction and*  
594 *targeted therapy* 2016;1:15004.
- 595 17. Furer V, Greenberg JD, Attur M, et al. The role of microRNA in rheumatoid arthritis  
596 and other autoimmune diseases. *Clinical Immunology* 2010;136(1):1-15.
- 597 18. Linsen SE, de Wit E, Janssens G, et al. Limitations and possibilities of small RNA  
598 digital gene expression profiling. *Nature methods* 2009;6(7):474.
- 599 19. Jayaprakash AD, Jabado O, Brown BD, et al. Identification and remediation of biases  
600 in the activity of RNA ligases in small-RNA deep sequencing. *Nucleic Acids*  
601 *Research* 2011;39(21):e141-e41.
- 602 20. Hafner M, Renwick N, Brown M, et al. RNA-ligase-dependent biases in miRNA  
603 representation in deep-sequenced small RNA cDNA libraries. *RNA*  
604 2011;17(9):1697-712.
- 605 21. Fuchs RT, Sun Z, Zhuang F, et al. Bias in ligation-based small RNA sequencing library  
606 construction is determined by adaptor and RNA structure. *PloS One*  
607 2015;10(5):e0126049.
- 608 22. Zhuang F, Fuchs RT, Sun Z, et al. Structural bias in T4 RNA ligase-mediated 3'-  
609 adapter ligation. *Nucleic Acids Research* 2012;40(7):e54-e54.
- 610 23. Shore S, Henderson JM, Lebedev A, et al. Small RNA library preparation method for  
611 next-generation sequencing using chemical modifications to prevent adapter  
612 dimer formation. *PloS One* 2016;11(11):e0167009.
- 613 24. Yehudai-Resheff S, Schuster G. Characterization of the E. coli poly (A) polymerase:  
614 nucleotide specificity, RNA-binding affinities and RNA structure dependence.  
615 *Nucleic Acids Research* 2000;28(5):1139-44.
- 616 25. Wright C, Rajpurohit A, Burke EE, et al. Comprehensive assessment of multiple  
617 biases in small RNA sequencing reveals significant differences in the  
618 performance of widely used methods. *BMC Genomics* 2019;20(1):513. doi:  
619 10.1186/s12864-019-5870-3
- 620 26. Hong J, Gresham D. Incorporation of unique molecular identifiers in TruSeq adapters  
621 improves the accuracy of quantitative sequencing. *BioTechniques*  
622 2017;63(5):221-26.
- 623 27. Fu Y, Wu P-H, Beane T, et al. Elimination of PCR duplicates in RNA-seq and small  
624 RNA-seq using unique molecular identifiers. *BMC Genomics* 2018;19(1):531.
- 625 28. Drinnenberg IA, Weinberg DE, Xie KT, et al. RNAi in budding yeast. *Science*  
626 2009;326(5952):544-50.
- 627 29. Martin M. Cutadapt removes adapter sequences from high-throughput sequencing  
628 reads. *EMBnet journal* 2011;17(1):pp. 10-12.
- 629 30. Langmead B, Trapnell C, Pop M, et al. Ultrafast and memory-efficient alignment of  
630 short DNA sequences to the human genome. *Genome Biology* 2009;10(3):R25.
- 631 31. Kozomara A, Griffiths-Jones S. miRBase: annotating high confidence microRNAs  
632 using deep sequencing data. *Nucleic Acids Research* 2013;42(D1):D68-D73.
- 633 32. Love MI, Huber W, Anders S. Moderated estimation of fold change and dispersion for  
634 RNA-seq data with DESeq2. *Genome biology* 2014;15(12):550.

- 635 33. R Core Team. R: A language and environment for statistical computing. 2013  
636 34. Wickham H, Chang W. ggplot2: An implementation of the Grammar of Graphics.  
637 CRAN 2008  
638 35. Conway JR, Lex A, Gehlenborg N. UpSetR: an R package for the visualization of  
639 intersecting sets and their properties. *Bioinformatics* 2017;33(18):2938-40.  
640 36. Revelle W. Package 'psych'. CRAN 2015  
641 37. Koo TK, Li MY. A guideline of selecting and reporting intraclass correlation  
642 coefficients for reliability research. *Journal of Chiropractic Medicine*  
643 2016;15(2):155-63.  
644 38. Chan Y. Biostatistics 104: correlational analysis. *Singapore Med J* 2003;44(12):614-9.  
645 39. Wei T, Simko V, Levy M, et al. Package 'corrplot'. *Statistician* 2017;56:316-24.  
646 40. Lehnert B. R Package "BlandAltmanLeh". CRAN 2014  
647 41. Robinson MD, McCarthy DJ, Smyth GK. edgeR: a Bioconductor package for  
648 differential expression analysis of digital gene expression data. *Bioinformatics*  
649 2010;26(1):139-40.  
650 42. Shippy R, Fulmer-Smentek S, Jensen RV, et al. Using RNA sample titrations to assess  
651 microarray platform performance and normalization techniques. *Nature*  
652 *Biotechnology* 2006;24(9):1123.  
653 43. Dard-Dascot C, Naquin D, d'Aubenton-Carafa Y, et al. Systematic comparison of small  
654 RNA library preparation protocols for next-generation sequencing. *BMC*  
655 *Genomics* 2018;19(1):118.  
656 44. Giraldez MD, Spengler RM, Etheridge A, et al. Comprehensive multi-center  
657 assessment of small RNA-seq methods for quantitative miRNA profiling. *Nature*  
658 *Biotechnology* 2018  
659 45. Coenen-Stass AM, Magen I, Brooks T, et al. Evaluation of methodologies for  
660 microRNA biomarker detection by next generation sequencing. *RNA Biology*  
661 2018;15(8):1133-45.  
662 46. Wong RK, MacMahon M, Woodside JV, et al. A comparison of RNA extraction and  
663 sequencing protocols for detection of small RNAs in plasma. *BMC genomics*  
664 2019;20(1):446.  
665 47. Sorefan K, Pais H, Hall AE, et al. Reducing ligation bias of small RNAs in libraries for  
666 next generation sequencing. *Silence* 2012;3(1):4.  
667 48. Pandis I, Ospelt C, Karagianni N, et al. Identification of microRNA-221/222 and  
668 microRNA-323-3p association with rheumatoid arthritis via predictions using  
669 the human tumour necrosis factor transgenic mouse model. *Annals of the*  
670 *Rheumatic Diseases* 2012;71(10):1716-23.  
671 49. Shibuya H, Nakasa T, Adachi N, et al. Overexpression of microRNA-223 in  
672 rheumatoid arthritis synovium controls osteoclast differentiation. *Modern*  
673 *Rheumatology* 2013;23(4):674-85.  
674 50. Fulci V, Scappucci G, Sebastiani GD, et al. miR-223 is overexpressed in T-  
675 lymphocytes of patients affected by rheumatoid arthritis. *Human Immunology*  
676 2010;71(2):206-11.  
677 51. Lu MC, Yu CL, Chen HC, et al. Increased miR-223 expression in T cells from patients  
678 with rheumatoid arthritis leads to decreased insulin-like growth  
679 factor-1-mediated interleukin-10 production. *Clinical & Experimental*  
680 *Immunology* 2014;177(3):641-51.

681 52. Murata K, Furu M, Yoshitomi H, et al. Comprehensive microRNA analysis identifies  
682 miR-24 and miR-125a-5p as plasma biomarkers for rheumatoid arthritis. *PloS*  
683 *One* 2013;8(7):e69118.  
684

685 **Appendices**

686 **Supplementary Figures** (document: Supplementary\_figures\_Heinicke\_etal2019.docx)

687 **Supplementary Tables** (document: Supplementary\_tables\_Heinicke\_etal2019.xlsx)

688 **Supplementary Material and Methods** (document:

689 Supplementary\_Material\_and\_Methods\_Heinicke\_etal2019.docx)

690

691

692

693

694

695

696

697

698

699

700

701

702

703

704

705 **Table 1: Small RNA library preparation methods tested in this study.**

| Method Name                                                     | Commercial supplier                | Key points*                                                                                                                                                                                         | Max. input volume tolerated | Reported RNA input range (varies with type of input tested) | Maximum number of indexes available | Method types                                        |
|-----------------------------------------------------------------|------------------------------------|-----------------------------------------------------------------------------------------------------------------------------------------------------------------------------------------------------|-----------------------------|-------------------------------------------------------------|-------------------------------------|-----------------------------------------------------|
| CATS Small RNA-Seq Kit (CATS)                                   | Diagenode s.a.                     | Single-tube, 4-step process of polynucleotide tailing, reverse transcription and PCR amplification. 1 purification step (2 if size selection required).                                             | 8 $\mu$ l                   | 0.1 – 100 ng                                                | 24                                  | Poly-A based. 2-adapter procedure                   |
| Small RNA-Seq Library Prep Kit (srLp)                           | Lexogen GmbH [Cat. No. 052, 058]   | 4-step procedure of 3' adapter ligation, 5' adapter ligation, reverse transcription and PCR. 2 purification steps (3 if size selection required).                                                   | 6 $\mu$ l                   | 0.05 – 1000 ng                                              | 96                                  | Ligase based. 2-adapter procedure                   |
| QIAseq miRNA Library Kit (QIAseq)                               | QIAGEN [Cat. No. 331502 or 331505] | 5-step procedure of 3' adapter ligation, 5' adapter ligation, reverse transcription and PCR. 2 purification steps (3 if size selection required).                                                   | 5 $\mu$ l                   | 1 – 500 ng                                                  | 96                                  | Ligase based. UMI incorporated. 2-adapter procedure |
| TailorMix microRNA Sample Preparation Kit Version 3 (TailorMix) | SeqMatic LLC.                      | 4-step procedure of 3' adapter ligation, 5' adapter ligation, reverse transcription and PCR. 2 purification steps, including a final PAGE gel excision.                                             | 6 $\mu$ l                   | 1– 1000 ng                                                  | 96                                  | Ligase based. 2-adapter procedure                   |
| SMARTer® miRNA-seq Kit (Beta version) (SMARTer)                 | Takara Bio USA Inc.                | 5-step procedure of 3' mono-adapter ligation, dephosphorylation, adapter dimer blocking, circularisation, reverse transcription and PCR. 2 purification steps, including a final PAGE gel excision. | 4 $\mu$ l                   | 100 – 1000 ng total RNA or 2 – 200 ng enriched small RNA    | 48                                  | Ligase based. Single adapter procedure              |

|                                                             |                                      |                                                                                                                                            |      |             |    |                                                |
|-------------------------------------------------------------|--------------------------------------|--------------------------------------------------------------------------------------------------------------------------------------------|------|-------------|----|------------------------------------------------|
| CleanTag™<br>Small RNA<br>Library Prep<br>Kit<br>(CleanTag) | TriLink<br>BioTechnologi<br>es, LLC. | Single-tube, 4-step<br>procedure of 3' adapter<br>ligation, 5' adapter ligation,<br>reverse transcription and<br>PCR. 1 purification step. | 10µl | 1 – 1000 ng | 48 | Ligase<br>based.<br>2-adapter<br>procedur<br>e |
|-------------------------------------------------------------|--------------------------------------|--------------------------------------------------------------------------------------------------------------------------------------------|------|-------------|----|------------------------------------------------|

706 \* A step is defined as a labwork period that culminates in an incubation longer than 5  
707 minutes.  
708

709

710

711

712

713

714

715

716

717

718

719

720

721

722

723

724

725

726

727

728

729 **Table 2: Fraction of titrating miRNAs (n=5) in each of the eight concentration groups. Average rlog**  
730 **expression values for the 40 non-equimolar miRNAs were calculated across the three replicates each of**  
731 **mixes A to D. Each miRNA was scored as titrating if the average values followed the expected trend in**  
732 **concentrations from high to low or vice versa across mixes A to D.**

| Conc. Ratio | CleanTag | QIaseq | srLp | Tailor Mix |
|-------------|----------|--------|------|------------|
| 0.01        | 1        | 1      | 1    | 1          |
| 0.1         | 0.8      | 1      | 1    | 1          |
| 0.2         | 1        | 1      | 0.8  | 0.8        |
| 0.5         | 0.8      | 0.6    | 0.4  | 0.6        |
| 2           | 0.6      | 0.8    | 0.8  | 0.2        |
| 5           | 0.4      | 1      | 1    | 0.8        |
| 10          | 0.6      | 1      | 1    | 0.6        |
| 100         | 0.8      | 1      | 0.8  | 0.8        |

733

734

735

736

737

738

739

740

741

742

743

744

745 **Figure 1**

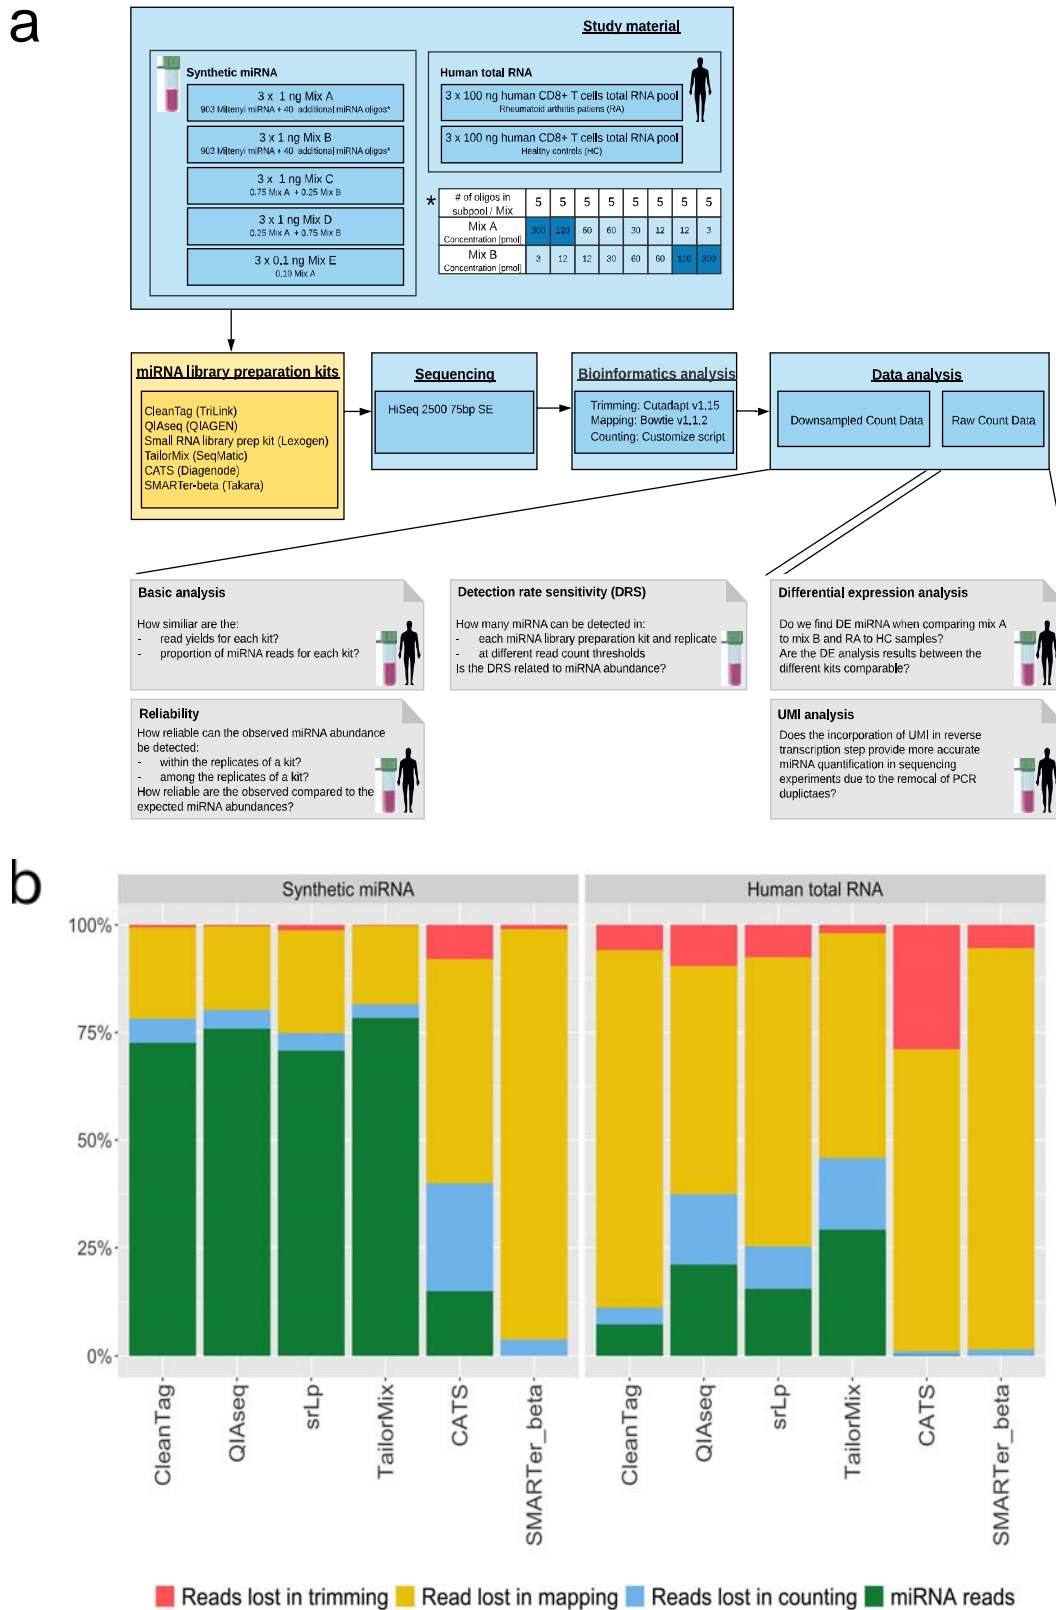

747 **Figure 2**

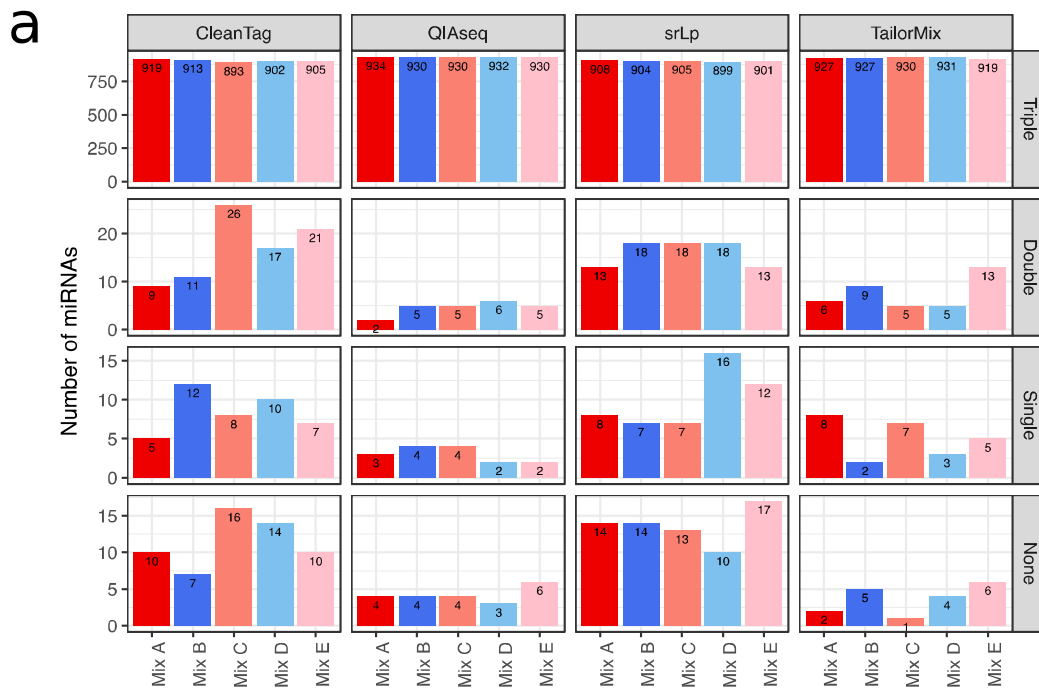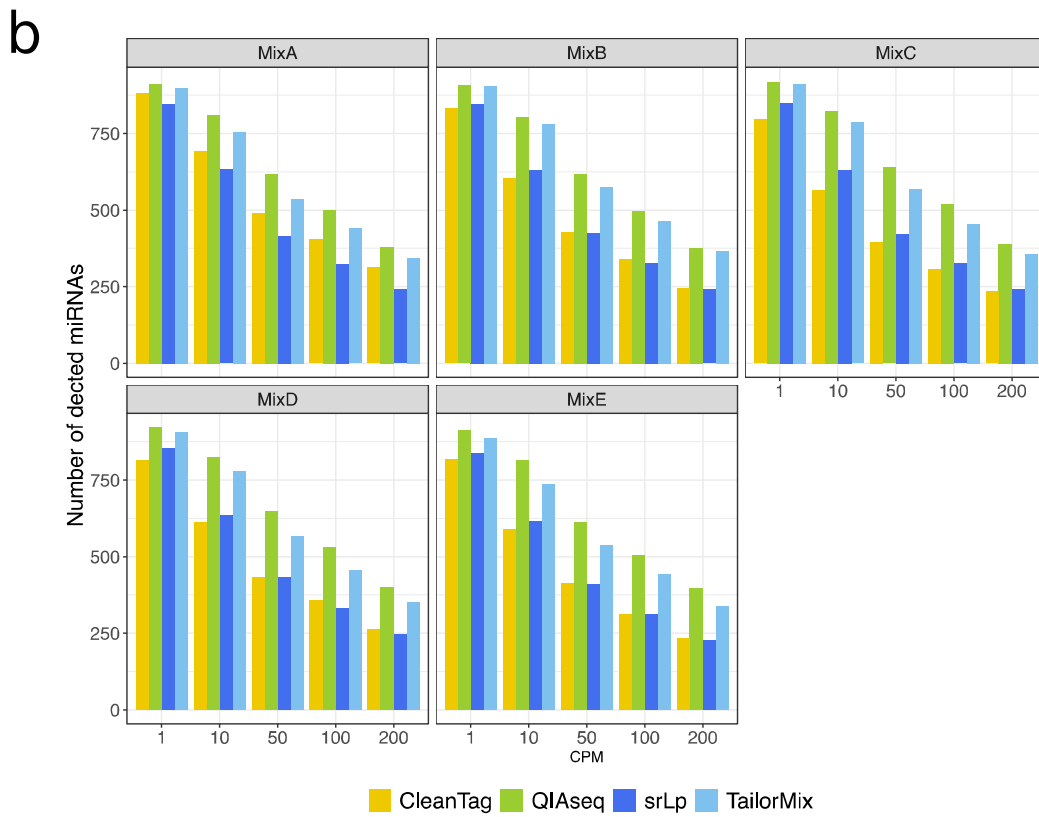

748



749 **Figure 3**

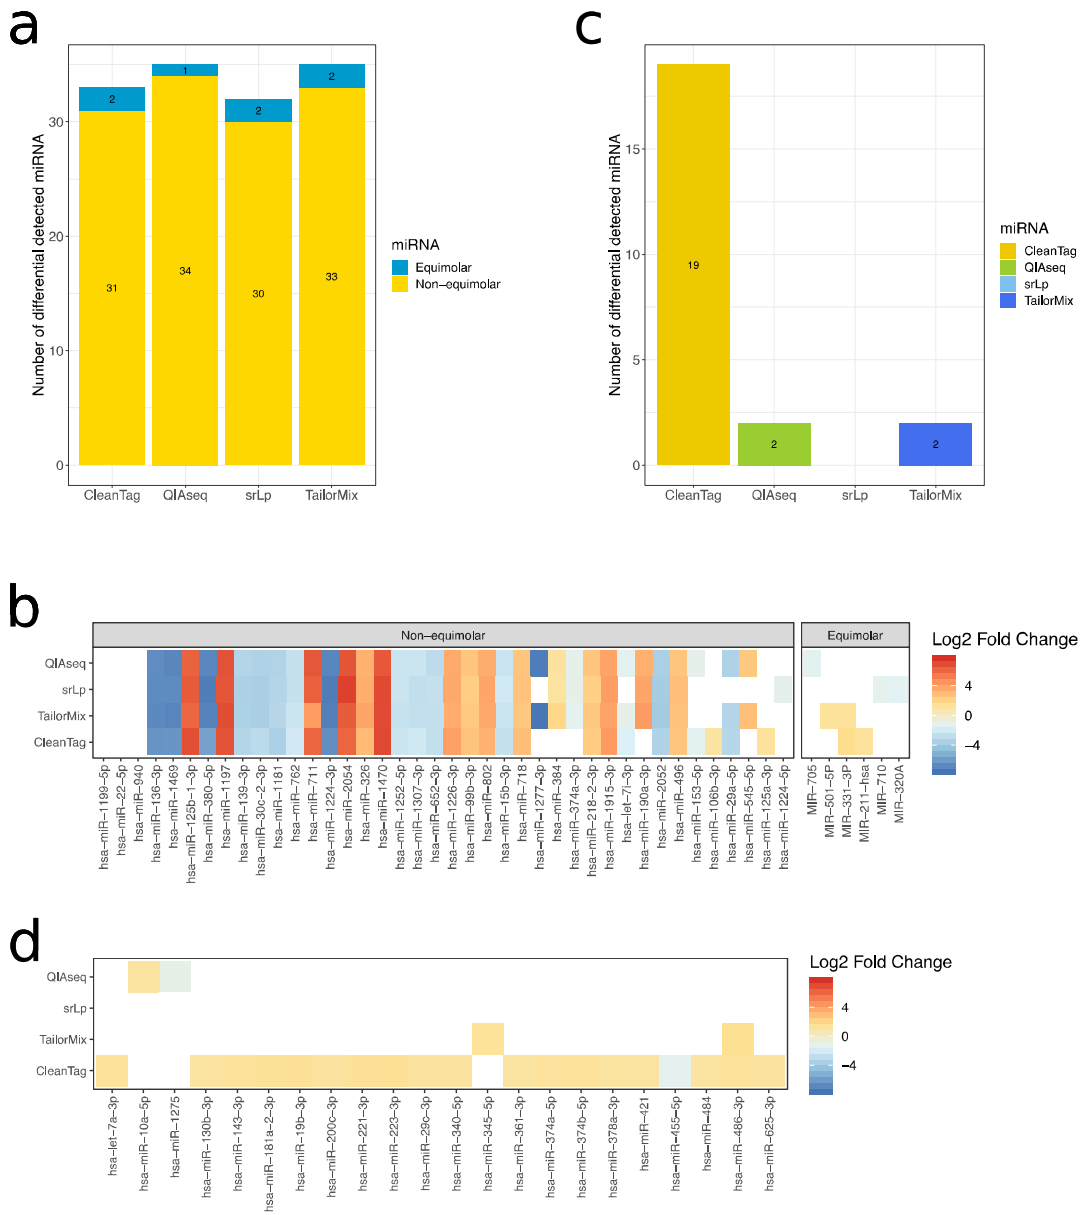

750

751

752

753

754

755

756

| Figure | Caption                                                                                                                                                                                                                                                                                                                                                                                                                                                                                                                                                                                                                                                                                                                                                                                                                                                                                                                                                                                                                                                                                            |
|--------|----------------------------------------------------------------------------------------------------------------------------------------------------------------------------------------------------------------------------------------------------------------------------------------------------------------------------------------------------------------------------------------------------------------------------------------------------------------------------------------------------------------------------------------------------------------------------------------------------------------------------------------------------------------------------------------------------------------------------------------------------------------------------------------------------------------------------------------------------------------------------------------------------------------------------------------------------------------------------------------------------------------------------------------------------------------------------------------------------|
| 1      | <p><b>Experimental design and sequencing read distribution. A: Overview of the study material, miRNA library preparation kits used, sequencing, bioinformatics and data analysis. Steps presented in blue boxes were performed in-house, while the step presented in the yellow box was executed by the indicated library preparation vendors. Grey boxes represent individual data analysis steps. B: Percentage of reads that were removed during the bioinformatic analysis and final miRNA proportion remaining (green). Trimming refers to removal of adapter sequences, mapping to miRNA reference alignment, and counting to filtering of aligned miRNAs that did not have the same length as the reference sequence. Results presented are the mean of 15 replicates in the synthetic miRNA (left) and the mean of six replicates in the human total RNA samples (right).</b></p> <p>Figure 1 A was created using images from Servier Medical Art (Servier. <a href="http://www.servier.com">www.servier.com</a>, licensed under a Creative Commons Attribution 3.0 Unported License).</p> |
| 2      | <p><b>Detection rate sensitivity. A: Bar charts presenting number of miRNAs detected in all replicates (Triple), in 2 out of 3 replicates (Double), in 1 out of 3 replicates (Single) or not detected in any replicate (None) across all synthetic miRNA mixes and all library preparation kits. The maximum number of detectable miRNAs is 943 (903 equimolar and 40 non-equimolar miRNA). B: Bar charts for various read count thresholds in the synthetic miRNA samples. A miRNA is defined as detected when it is (i) expressed in all three replicates of the mix and (ii) the read counts are greater or equal to the count per million (CPM) threshold displayed on the x-axis. The colours of the bars represent the reagents.</b></p>                                                                                                                                                                                                                                                                                                                                                     |
| 3      | <p><b>Differential expression analysis. Kit-specific number of differentially expressed miRNA detected for A: synthetic miRNA samples (mix A versus mix B) and C: human total RNA samples (RA versus healthy control). miRNA-specific log<sub>2</sub> fold changes across the different kits for B: synthetic miRNA samples and D: human total RNA samples.</b></p>                                                                                                                                                                                                                                                                                                                                                                                                                                                                                                                                                                                                                                                                                                                                |

757
